# Supplementary material
Source: PubMed Central journal article supplement (PMC4311198)
Supplement: supp_tpc.114.131193_tpc131193_SupplementalData.pdf [file supp_tpc.114.131193_tpc131193_SupplementalData.pdf]

**Supplemental Figure 1 - Multiple sequence alignment (Combet et al., 2000) of CESAs with epitope peptides highlighted**

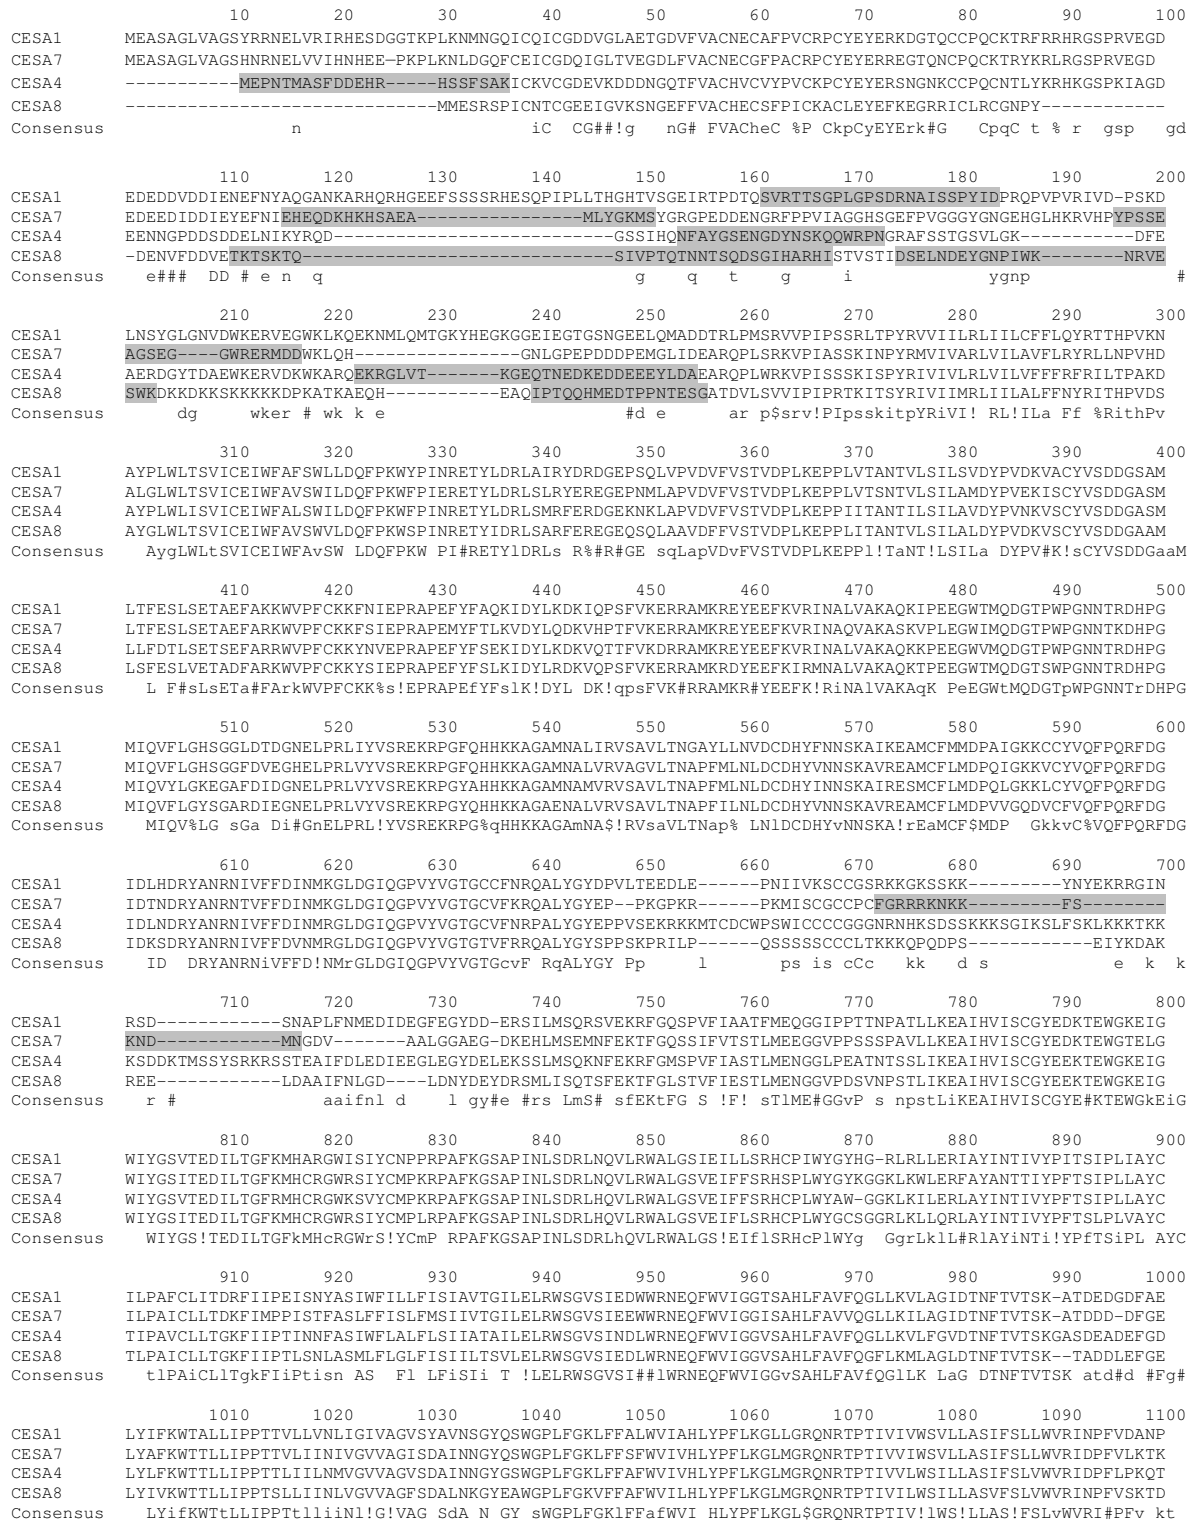

**Supplemental Table 1 - Peptides used to generate CESA antibodies**

|         |                               |
|---------|-------------------------------|
| CESA1   | CSVRTTSGPLGPSDRNAISSPYID      |
| CESA4.1 | CMEPNTMASFDDEHRHSSFSK         |
| CESA4.2 | CEKRGLVTKGEQTNEDEDEEYLDA      |
| CESA4.3 | CNFAYGSENGDYNKQWRPN           |
| CESA7.1 | CEHEQDKHKHSAEAMLYGKMS         |
| CESA7.2 | CYPSSEAGSEGGWRERMDD           |
| CESA7.3 | CFGRRRNKKNKFSKNDMN            |
| CESA8.1 | CTKTSKTQSIVPTQTNNTSQDSGIHARHI |
| CESA8.2 | CIPTQQHMEDTPPNTESG            |
| CESA8.3 | CDESELNDEYGNPIWKNRVESWK       |

**Supplemental Table 2 - Primers for cloning of CESAs into pF3A**

|       |         |                                                            |
|-------|---------|------------------------------------------------------------|
| CESA4 | Forward | acccttctatccccaccgcgcatcgc <b>ATGGAACCAAACACCATGGC</b>     |
| CESA4 | Reverse | tgctagtgggtgttcttctactggtacc <b>TAAACAGTCGACGCCACATTG</b>  |
| CESA7 | Forward | acccttctatccccaccgcgcatcgc <b>ATGGAAGCTAGCGCCGG</b>        |
| CESA7 | Reverse | tgctagtgggtgttcttctactggtacc <b>TCAGCAGTTGATGCCACAC</b>    |
| CESA8 | Forward | acccttctatccccaccgcgcatcgc <b>ATGATGGAGTCTAGGTCTCCCAT</b>  |
| CESA8 | Reverse | tgctagtgggtgttcttctactggtacc <b>TTAGCAATCGATCAAAAGACAG</b> |

Start and Stop codons in bold

**Supplemental References**

**Combet, C., Blanchet, C., Geourjon, C., and Deléage, G. (2000).** NPS@: network protein sequence analysis. Trends Biochem. Sci. **25**: 147–50.
